# Supplementary material
Source: PubMed Central journal article supplement (PMC3613927)
Supplement: JCI66517sd.pdf [file JCI66517sd.pdf]

## Supplemental Table I

### Phenotype of Bone Marrow Mesenchymal Stromal Cells (BM-MSCs) (%)

|              | NBM1 | NBM2 | NBM3 | MM1  | MM2  | MM3  |
|--------------|------|------|------|------|------|------|
| <b>CD14</b>  | 0.5  | 0    | 0.2  | 0    | 0.1  | 0.4  |
| <b>CD34</b>  | 0    | 0    | 0    | 0    | 0    | 0    |
| <b>CD45</b>  | 0    | 0    | 0    | 0    | 0    | 0    |
| <b>CD138</b> | 0    | 0    | 0    | 0    | 0    | 0    |
| <b>CD73</b>  | 95.3 | 100  | 97.5 | 100  | 96.2 | 100  |
| <b>CD90</b>  | 96.2 | 98.3 | 96.9 | 96.2 | 97.2 | 100  |
| <b>CD105</b> | 97.9 | 100  | 98.1 | 96.9 | 98.6 | 100  |
| <b>CD106</b> | 98.4 | 99.6 | 98.3 | 98.2 | 95.7 | 97.8 |

#### Supplemental Table 1. Phenotype of bone marrow mesenchymal stromal cells (BM-MSCs)

Phenotype of normal (n=3) and MM (n=3) BM-MSCs was evaluated by flow cytometry using anti-CD14, -34, -45, -138, -73, -90, -105, -106 antibodies. Appropriate isotype controls were also included. Both normal and MM MSCs were devoid of hematopoietic cells (CD34-, CD138-, CD45-, CD14-), and positive for the remaining markers, indicating their multipotent mesenchymal stromal cell phenotype.

## Supplemental Figure 1

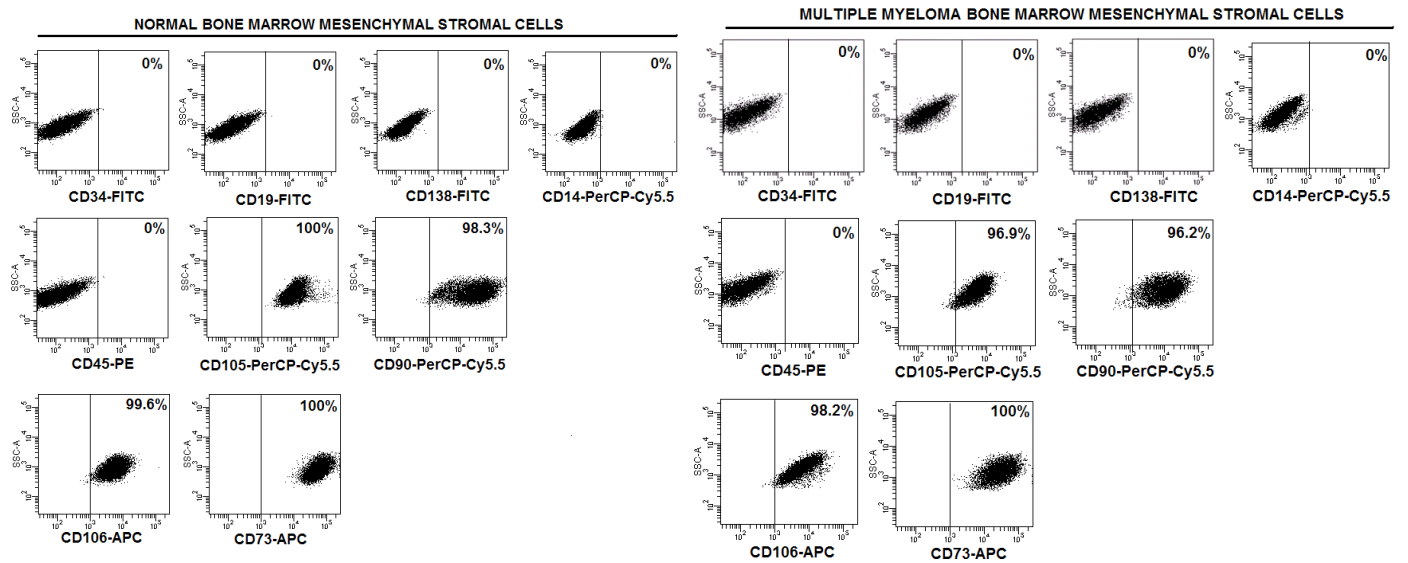

### Supplemental Figure 1. Primary human BM-MSCs: phenotype.

Phenotype of primary multipotent mesenchymal stromal cells have been evaluated by flow cytometry using anti-CD34-FITC, CD19-FITC, CD-138-FITC, CD105-PerCPCy5.5, CD90- PerCPCy5.5, CD14-PerCPCy5.5, CD106-APC, CD73-APC, and CD45-PE antibodies.

**Supplemental Figure 2**

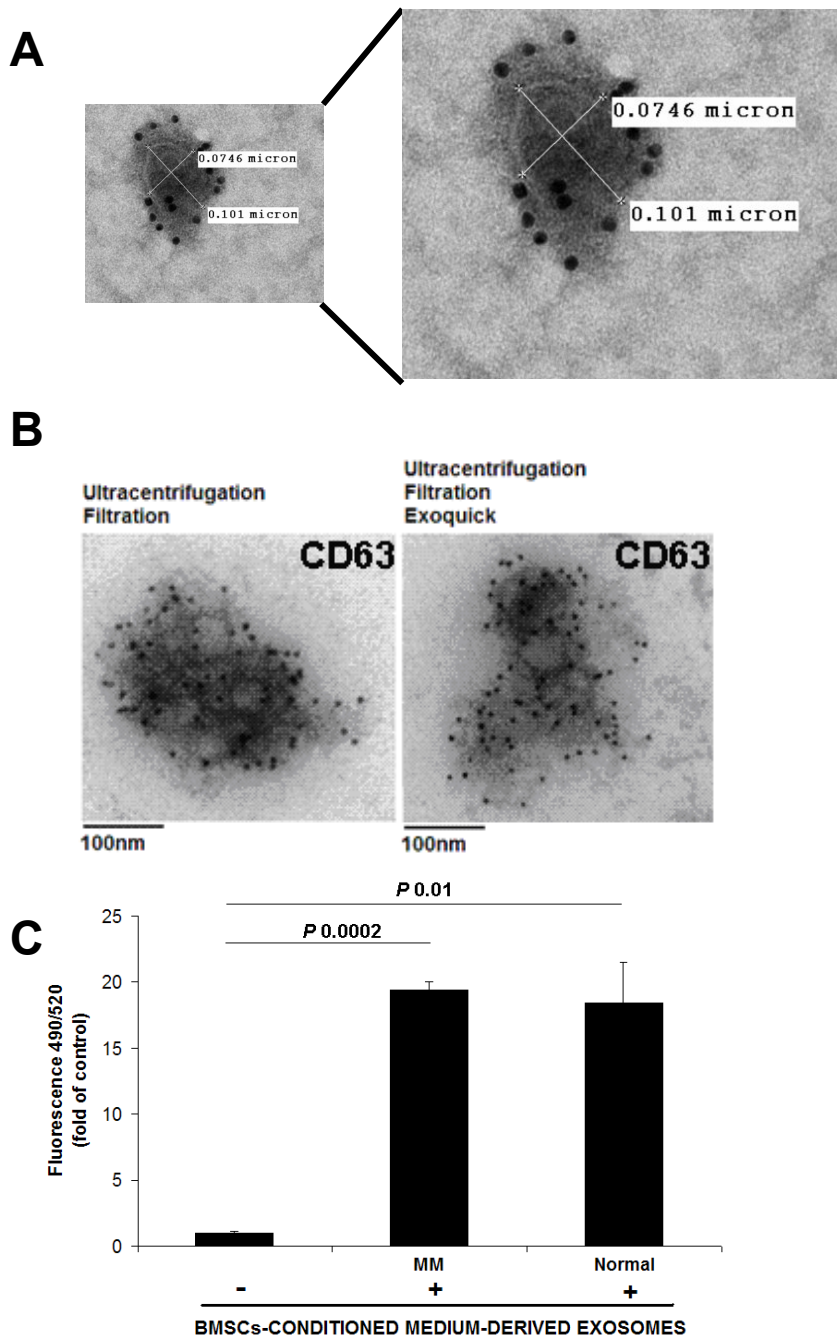

**Supplemental Figure 2. Characterization of bone marrow mesenchymal stromal cells (BM-MSCs)-derived exosomes and their ability to be transferred to MM cells.**

(A) Electron microscopy of MM-BM-MSC-derived exosomes, showing small vesicles of 74.6x100.1nm. Arrows indicate a cell membrane-like bi-layer. (B) Exosomes have been isolated from the conditioned medium of MM-BM-MSCs, using ultracentrifugation, with and without using ExoQuik solution. Exosomes have been immunogold labeled with anti-CD63, showing similar results between the two procedures adopted. The scale bar indicates 100nm. (C) MM.1S cells were cultured in absence (I) or presence of normal (II) or MM-BM-MSCs (III)-derived PKH67-labelled exosomes, for 30 minutes. Uptake of fluorescently labeled exosomes by MM cells was also detected by using a fluorescence plate reader (excitation wavelength 490nm; emission wavelength 520nm). All data represent mean ( $\pm$  S.D.) of triplicate experiments.

Supplemental Figure 3

A

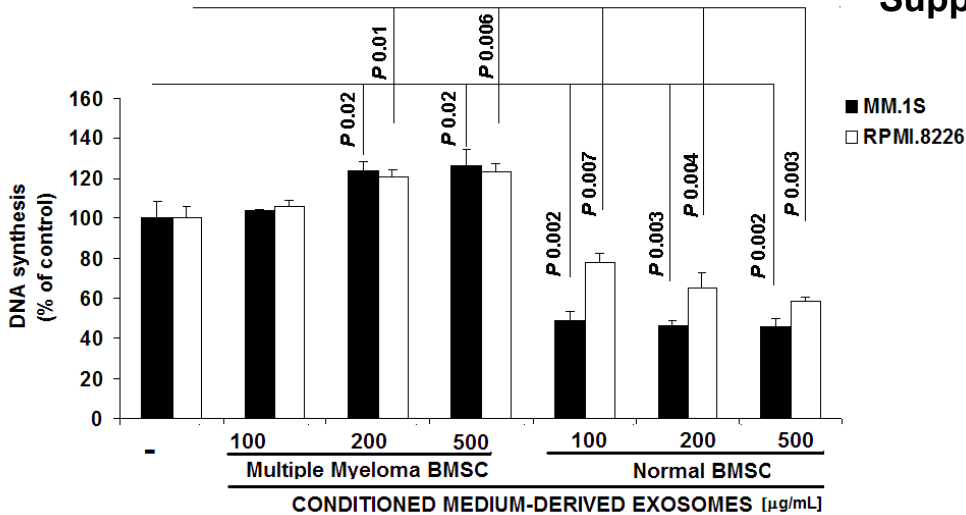

B

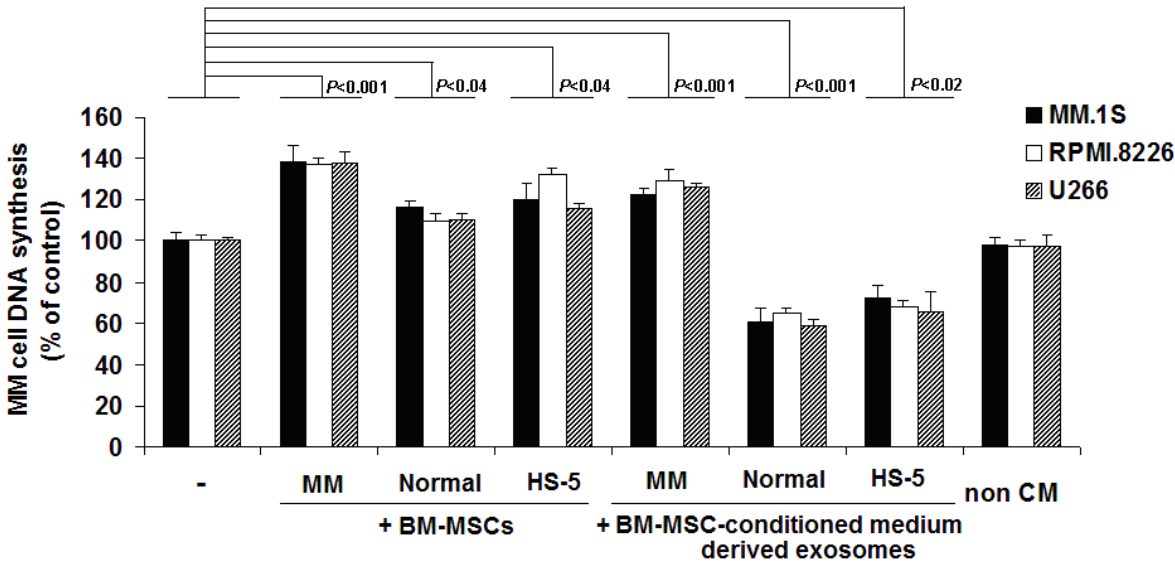

C

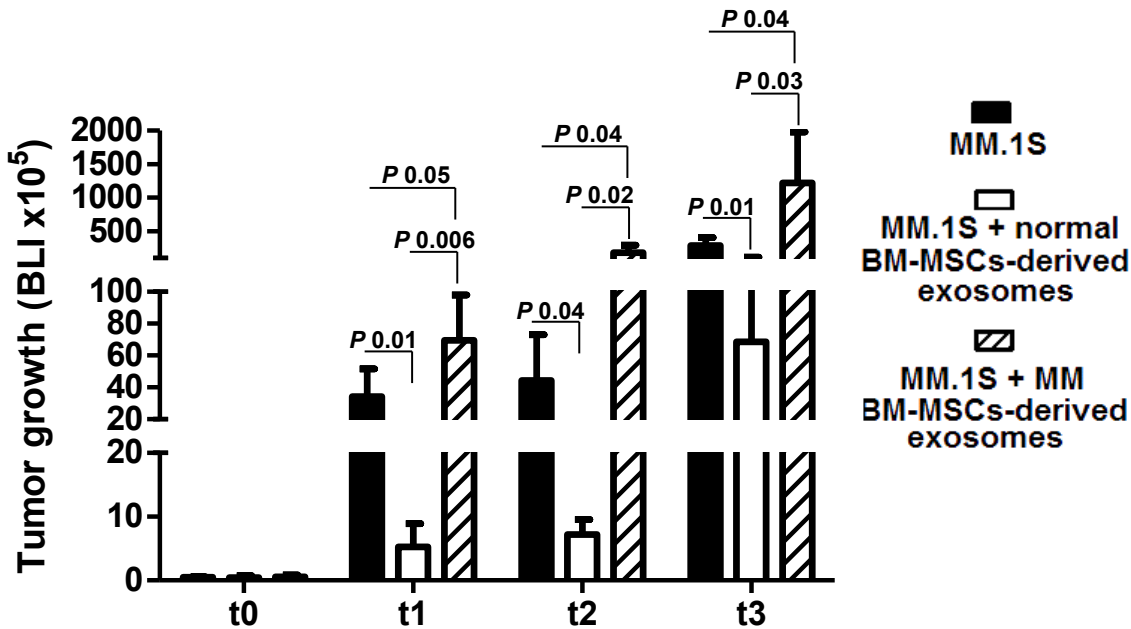

D

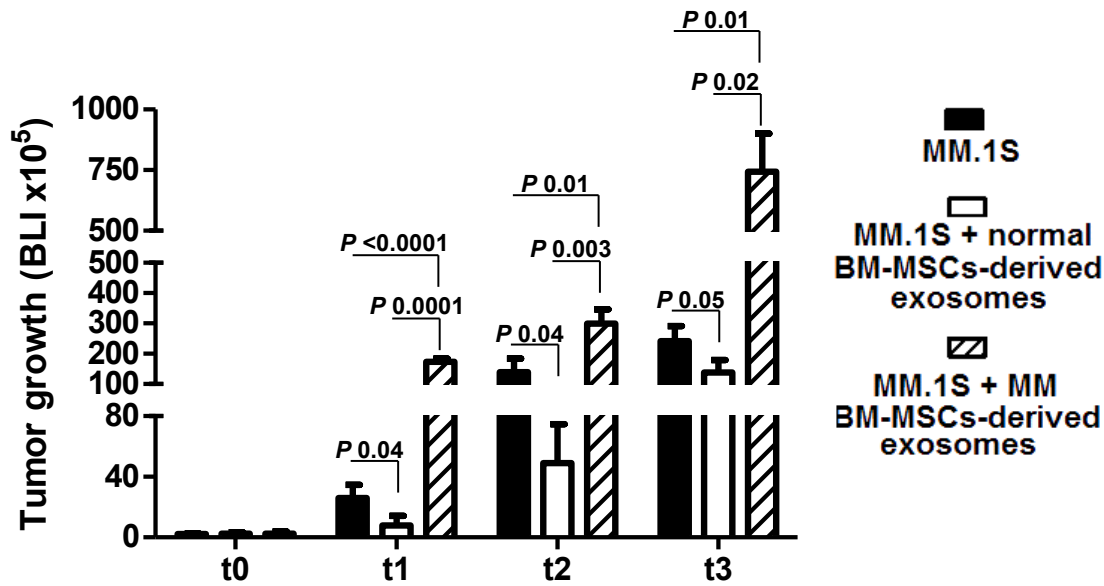

**Supplemental Figure 3. Normal and MM BM-MSC-derived exosomes differentially target MM cells in vitro and in vivo.**

(A) MM cells (MM.1S; RPMI.8226) were cultured in absence (-) or presence of MM or normal BM-MSC-derived exosomes (100-500mg/mL; 48h). Cell proliferation was assessed using [<sup>3</sup>H]-thymidine uptake). (B) MM cells (MM.1S; RPMI.8226; U266) were cultured in absence (-) or presence of MM, normal-BM-MSCs, HS-5 cells; or in presence of MM or normal BM-MSC-derived exosomes (200mg/mL) for 48h. Cell proliferation was assessed using [<sup>3</sup>H]-thymidine uptake. (C; D) Tissue-engineered bones (T.E.B.) were loaded with either MM.1S-GFP+/Luc+ cells alone or with primary MM or normal-BM-MSC-derived exosomes (3x10<sup>6</sup>cells/T.E.B.; 1mg exosomes), and implanted subcutaneously (S.C.) in SCID mice. Detection of tumor growth, as performed by measuring bioluminescence imaging (BLI) intensity, at baseline (t0), day 7 (t1), 10 (t2), and 14 (t3) (in panel C: n=5/each group; in panel D: n=3/each group).

Supplemental Figure 4

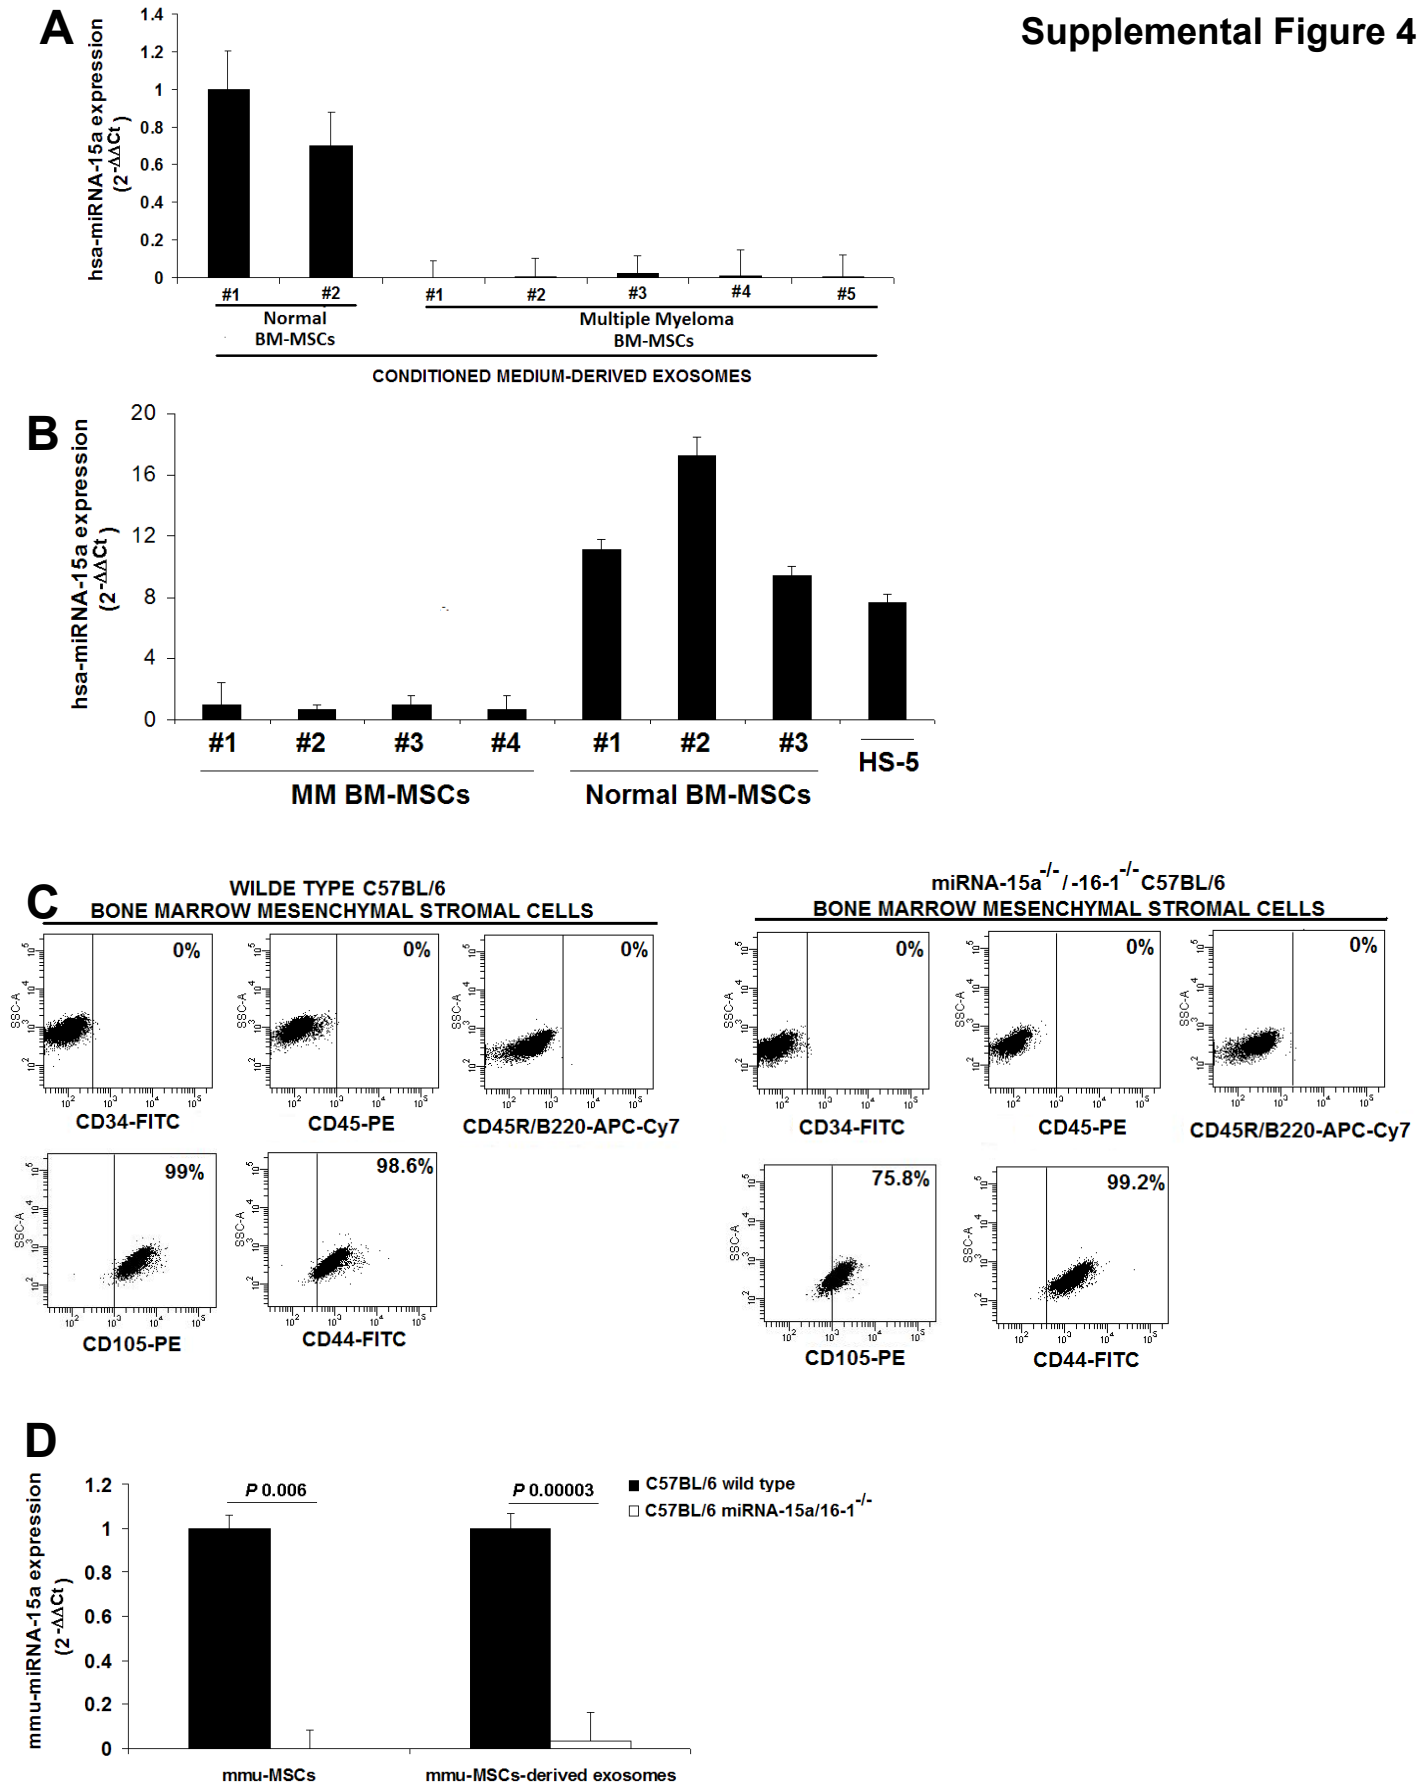

## Supplemental Figure 4

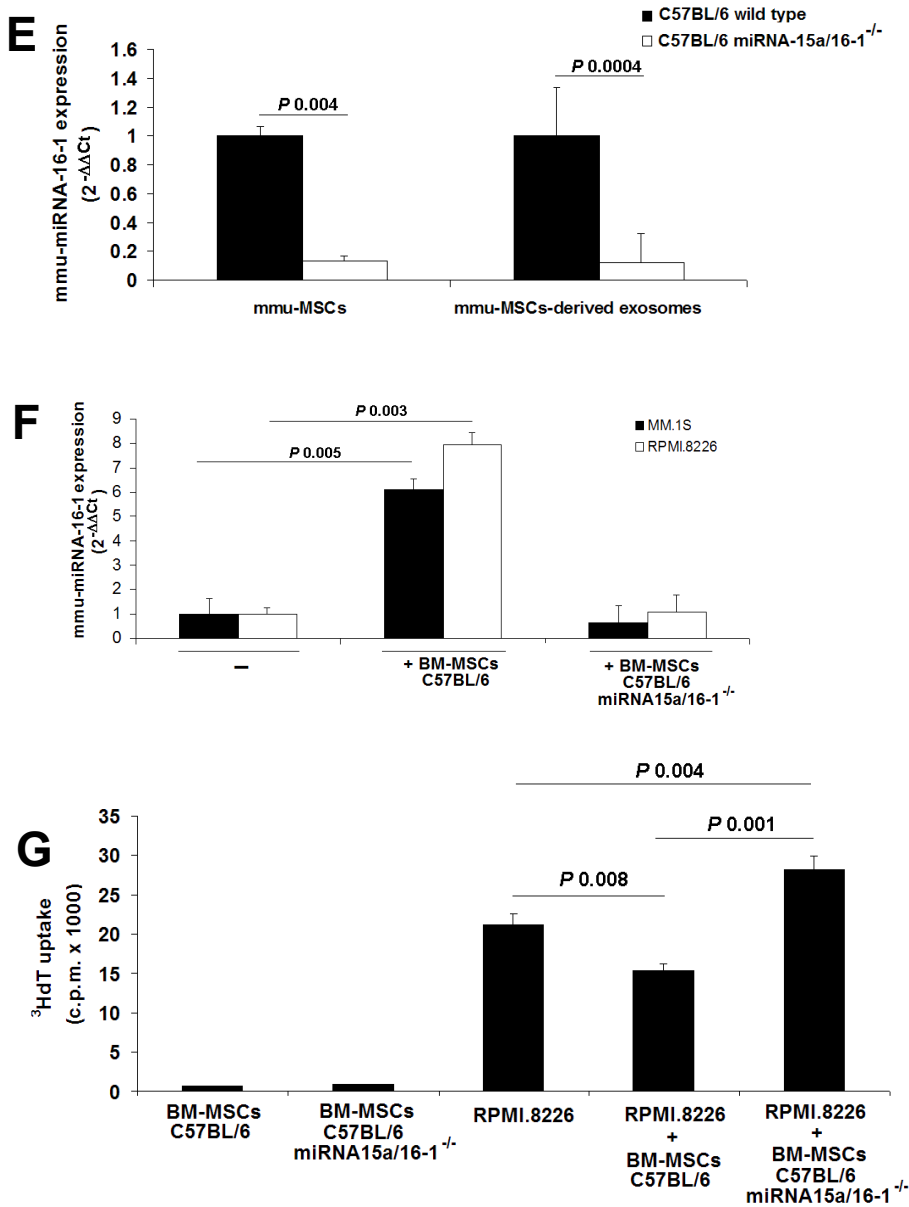

### Supplemental Figure 4. Detection of miRNA-15a and-16-1 expression.

(A) miRNA-15q levels have been evaluated in primary normal (n=2) and MM (n=5) BM-MSC-derived exosomes, by qRT-PCR using the DDCT method, with normalization to the reference C. Elegans miRNA-39, used as spiked control. (B) miRNA-15a expression level has been evaluated by qRT-PCR in primary MM (n=4), normal (n=3) BM-MSCs, and the HS-5 cell line, using the DDCT method, with normalization to the reference RNU6B miRNA. Bars represent S.D. (C) Murine BM-MSCs were isolated from C57BL/6-15a/16-1<sup>-/-</sup> or wild type mice. Phenotype has been evaluated by flow cytometry using anti-CD34-FITC, CD45-PE, CD45R-APC-Cy7, CD105- and CD44-FITC antibodies. (E; F) miRNA-15a and -16-1 expression levels have been evaluated on both BM-MSCs (C57BL/6-15a/16-1<sup>-/-</sup> or wild type) and BM-MSC-derived exosomes (C57BL/6-15a/16-1<sup>-/-</sup> or wild type), by qRT-PCR using the DDCT method with normalization to the reference of C. Elegans miRNA-39 or RNU6B, respectively. Bars indicate S.D. (E) Murine exosomes have been isolated from the BM of either C57BL/6 or C57BL/6 miRNA-15a/16-1<sup>-/-</sup> mice; and subsequently added to MM cells (MM.1S; RPMI.8226) for 48 hours. mmu-miRNA-16-1 levels have been evaluated in human MM cells by qRT-PCR using the DDCT method, with normalization to the reference C. Elegans miRNA-39, used as spiked control. Bars represent S.D. (F) RPMI.8226 cells were cultured in presence or absence of murine C57BL/6 BM-MSCs (either wild type or miRNA-15a/16-1<sup>-/-</sup>) for 48 hours. Cell proliferation was assessed using [<sup>3</sup>H]-thymidine uptake. Bars indicate S.D.

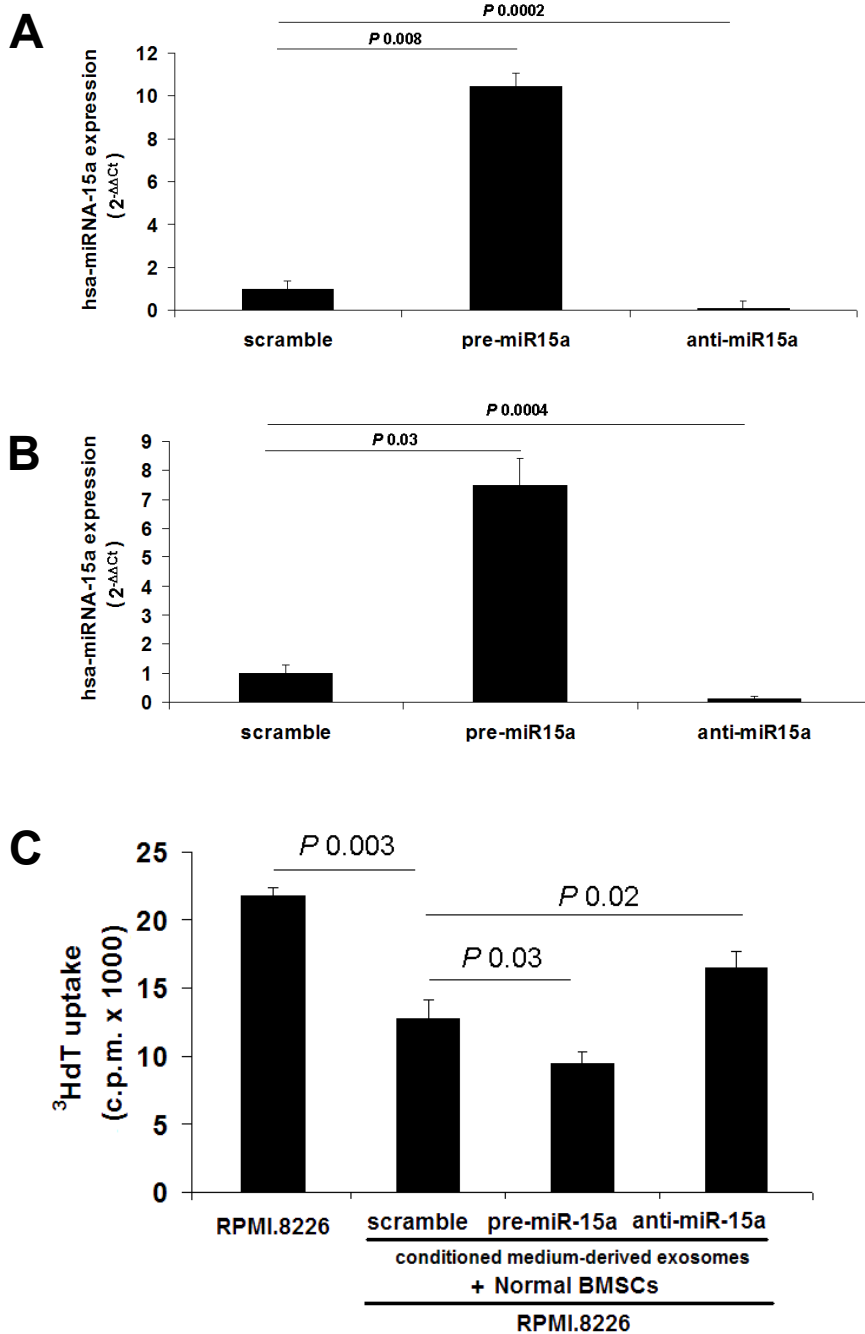

### Supplemental Figure 5. Functional effect of miRNA-15a on MM cell behavior.

HS-5 cells (**A**) and primary normal BM-MSCs (**B**) have been transfected with either precursor(pre), anti-miRNA-15a, or scrambled probe. Hsa-miRNA-15a expression levels have been evaluated in transfected cells by qRT-PCR, using the DDCT method with normalization to RNU6B. (**C**) Primary normal BM-MSCs were transfected with either scramble, pre-miR-15a, or anti-miR-15a-probe. RPMI.8226 cells were exposed to conditioned medium-derived exosomes isolated from BM-MSC-transfected BM-MSCs for 48 hours. Cell proliferation was assessed using [ $^3\text{H}$ ]-thymidine uptake assay. Bars indicate S.D.

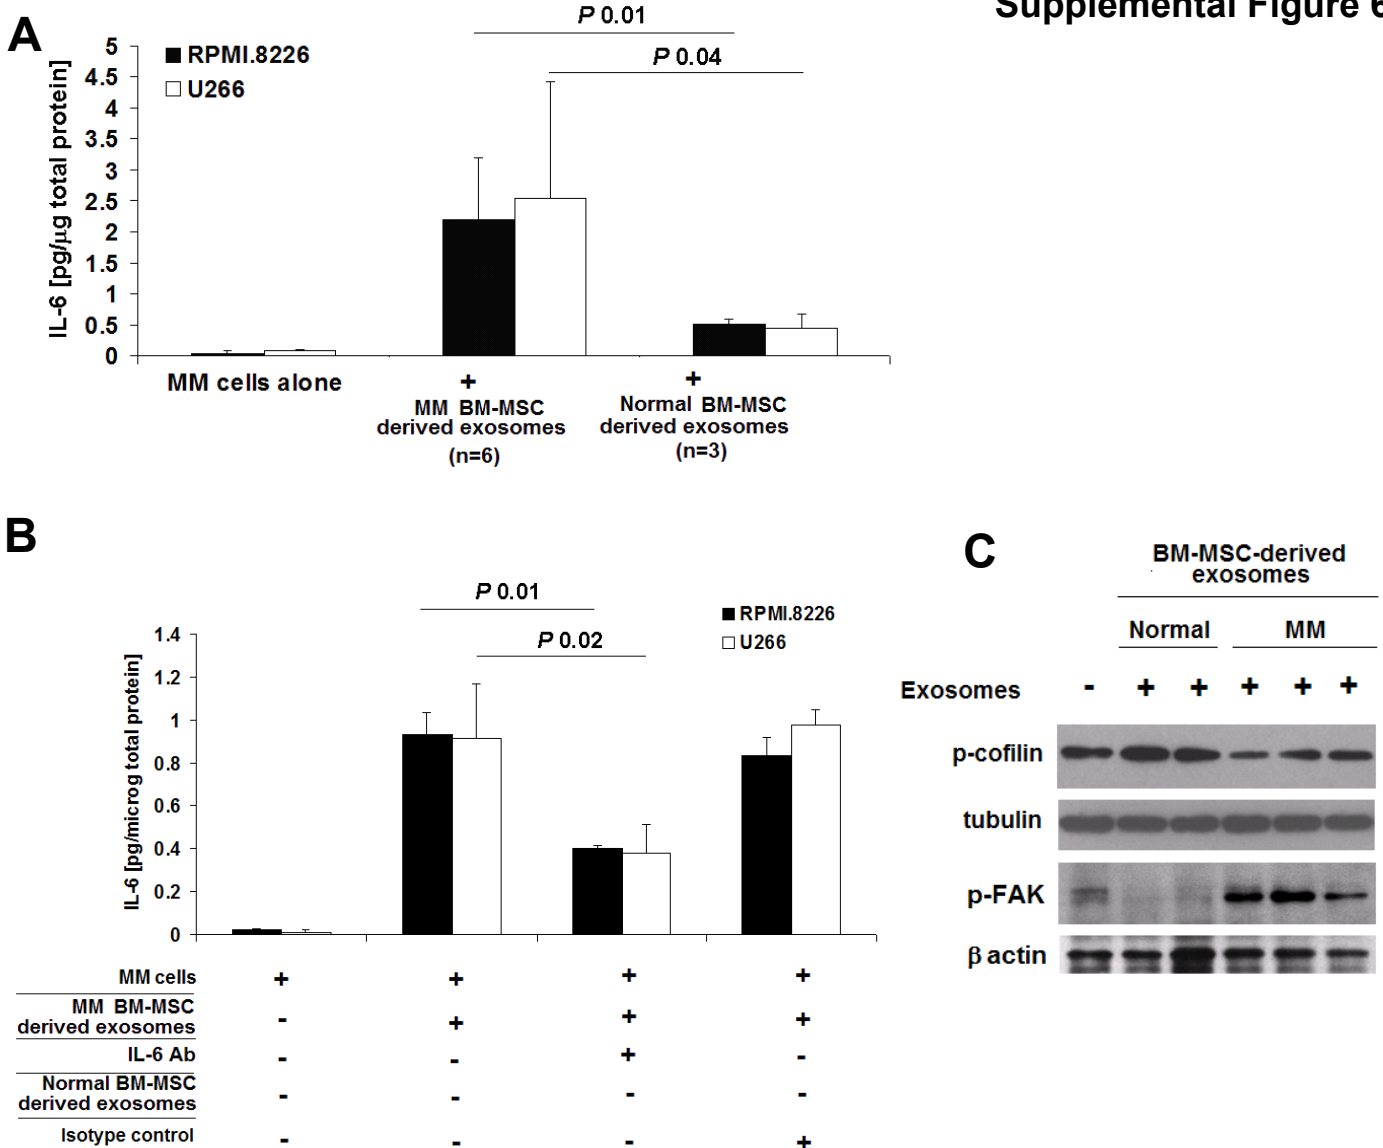

**Supplemental Figure 6. Normal and MM-BM-MSC-derived exosomes differentially impact IL-6 secretion from MM cells.**

(A) MM cells (RPMI.8226; U266) were exposed to exosomes isolated from either MM BM-MSCs (n=6) or normal BM-MSCs (n=3), for 24 hours and IL-6 has been measured in conditioned media, using human IL-6 ELISA. IL-6 concentration has been calculated as pg/mg of total protein. Bars indicate S.D. (B) MM cells (RPMI.8226; U266) were exposed to exosomes isolated from either MM BM-MSCs or normal BM-MSCs, for 24 hours and IL-6 was measured in conditioned media, in the presence or absence of IL-6 blocking antibody (0.2mg/mL) using human IL-6 ELISA. IL-6 concentration has been calculated as pg/mg of total protein. Mouse IgG2B isotype control has been used. Bars indicate S.D. (C) MM.1S cells were cultured in absence (-) or presence of normal or MM BM-MSC-derived exosomes (200mg/mL) for 8 hours. Whole cell lysates were subjected to Western blotting using anti-phospho(p)-cofilin, -p-FAK, -β actin and -tubulin antibodies.

Supplemental table 2: Analysis of two-channel protein expression microarray experiment.

| Exosomal content |                                                                                                                       |                                  |                                                    |         | Cellular content                    |                                                    |         |
|------------------|-----------------------------------------------------------------------------------------------------------------------|----------------------------------|----------------------------------------------------|---------|-------------------------------------|----------------------------------------------------|---------|
| rank             | protein                                                                                                               | Log fold change<br>to the base 2 | Standard<br>deviation of<br>the log fold<br>change | p-value | Log fold change<br>to the base<br>2 | Standard<br>deviation of<br>the log fold<br>change | p-value |
| 1                | fibronectin 1                                                                                                         | 0.64027                          | 0.50849                                            | 0.00696 | -0.17826                            | 0.08325                                            | 0.04610 |
| 2                | junction plakoglobin                                                                                                  | 0.49493                          | 0.37822                                            | 0.01406 | 0.00881                             | 0.01485                                            | 0.80700 |
| 3                | chemokine (C-C motif) ligand 2                                                                                        | 0.30280                          | 0.11573                                            | 0.00738 | 0.06264                             | 0.04945                                            | 0.34600 |
| 4                | mitogen-activated protein kinase kinase 5                                                                             | 0.22301                          | 0.24709                                            | 0.15144 | 0.15800                             | 0.46231                                            | 0.43500 |
| 5                | excision repair cross-complementing<br>rodent repair deficiency, complementation<br>group 2 (xeroderma pigmentosum D) | 0.21293                          | 0.09205                                            | 0.02965 | -0.03803                            | 0.02577                                            | 0.42600 |
| 6                | ubiquitin-conjugating enzyme E2E 1<br>(UBC4/5 homolog, yeast)                                                         | 0.20581                          | 0.26500                                            | 0.19903 | -0.20635                            | 0.09204                                            | 0.02950 |
| 7                | DEAH (Asp-Glu-Ala-His) box polypeptide<br>38                                                                          | 0.20344                          | 0.09891                                            | 0.04338 | -0.01924                            | 0.06107                                            | 0.79200 |
| 8                | interleukin 13                                                                                                        | 0.18181                          | 0.06088                                            | 0.02310 | -0.17327                            | 0.91401                                            | 0.54200 |
| 9                | cell division cycle 27                                                                                                | 0.18140                          | 2.48755                                            | 0.70696 | 0.15235                             | 0.94889                                            | 0.59800 |
| 10               | RAP1, GTPase activating protein 1                                                                                     | 0.16593                          | 0.24770                                            | 0.28143 | -0.17462                            | 0.26251                                            | 0.25600 |
| 11               | non-POU domain containing, octamer-<br>binding                                                                        | 0.16317                          | 0.21599                                            | 0.25734 | 0.16096                             | 0.21214                                            | 0.24500 |
| 12               | interleukin 6 (interferon, beta 2)                                                                                    | 0.15085                          | 0.04921                                            | 0.03454 | -0.01480                            | 0.03152                                            | 0.77800 |
| 13               | ribosomal protein S6 kinase, 90kDa,<br>polypeptide 1                                                                  | 0.15061                          | 0.29210                                            | 0.36607 | 0.01729                             | 0.01997                                            | 0.68000 |
| 14               | protein kinase C, beta 1                                                                                              | 0.14945                          | 0.21418                                            | 0.29642 | 0.18858                             | 0.03026                                            | 0.00122 |
| 15               | B-cell linker                                                                                                         | 0.13891                          | 0.10303                                            | 0.16578 | -0.07027                            | 0.02750                                            | 0.16100 |
| 16               | early endosome antigen 1, 162kD                                                                                       | 0.13469                          | 0.05740                                            | 0.07592 | -0.03913                            | 0.03138                                            | 0.45800 |

|      |                                                                                                                                                                | Exosomal content                 |                                                    |         | Cellular content                       |                                                    |         |
|------|----------------------------------------------------------------------------------------------------------------------------------------------------------------|----------------------------------|----------------------------------------------------|---------|----------------------------------------|----------------------------------------------------|---------|
| rank | protein                                                                                                                                                        | Log fold change<br>to the base 2 | Standard<br>deviation of<br>the log fold<br>change | p-value | Log fold<br>change<br>to the base<br>2 | Standard<br>deviation of<br>the log fold<br>change | p-value |
| 17   | procollagen-proline, 2-oxoglutarate 4-dioxygenase (proline 4-hydroxylase), beta polypeptide (protein disulfide isomerase; thyroid hormone binding protein p55) | 0.13156                          | 0.07975                                            | 0.13704 | 0.07113                                | 0.27361                                            | 0.64600 |
| 18   | nucleoporin 88kDa                                                                                                                                              | 0.12876                          | 0.64740                                            | 0.60146 | 0.46419                                | 0.41224                                            | 0.02160 |
| 19   | cholinergic receptor, muscarinic 1                                                                                                                             | 0.12863                          | 0.04813                                            | 0.06497 | -0.06453                               | 0.02217                                            | 0.15200 |
| 20   | eukaryotic translation initiation factor 4E                                                                                                                    | 0.12816                          | 0.09171                                            | 0.17493 | 0.09579                                | 0.04243                                            | 0.12600 |
| 21   | gelsolin (amyloidosis, Finnish type)                                                                                                                           | 0.12550                          | 0.14656                                            | 0.28933 | -0.19905                               | 0.04927                                            | 0.00561 |
| 22   | myogenic factor 3                                                                                                                                              | 0.12050                          | 0.06909                                            | 0.14312 | 0.06016                                | 0.04793                                            | 0.35700 |
| 23   | protein kinase, cAMP-dependent, catalytic, alpha                                                                                                               | 0.11398                          | 0.11500                                            | 0.27763 | -0.03979                               | 0.04790                                            | 0.54000 |
| 24   | sortilin-related receptor, L(DLR class) A repeats-containing                                                                                                   | 0.11221                          | 0.03889                                            | 0.07270 | 0.01641                                | 0.02050                                            | 0.69900 |
| 25   | antigen identified by monoclonal antibody Ki-67                                                                                                                | 0.11098                          | 0.05966                                            | 0.14652 | 0.05964                                | 0.03756                                            | 0.30400 |
| 26   | centrosomal protein 2                                                                                                                                          | 0.11000                          | 0.15842                                            | 0.36997 | -0.15400                               | 0.06636                                            | 0.05290 |
| 27   | stromal interaction molecule 1                                                                                                                                 | 0.10934                          | 0.09616                                            | 0.25538 | -0.08721                               | 0.02430                                            | 0.06870 |
| 28   | small inducible cytokine subfamily E, member 1 (endothelial monocyte-activating)                                                                               | 0.10927                          | 0.04068                                            | 0.08644 | -0.23426                               | 0.07656                                            | 0.00835 |
| 29   | tumor necrosis factor (TNF superfamily, member 2)                                                                                                              | 0.10653                          | 0.03856                                            | 0.08604 | 0.11632                                | 0.14001                                            | 0.29900 |
| 30   | farnesyl-diphosphate farnesyltransferase 1                                                                                                                     | 0.10279                          | 0.11789                                            | 0.33223 | 0.15551                                | 0.25355                                            | 0.30200 |
| 31   | RAB5A, member RAS oncogene family                                                                                                                              | 0.10240                          | 0.03077                                            | 0.06609 | 0.04411                                | 0.03292                                            | 0.41500 |
| 32   | O-6-methylguanine-DNA methyltransferase                                                                                                                        | 0.10134                          | 0.03893                                            | 0.10296 | -0.00992                               | 0.02451                                            | 0.83000 |



**Supplemental table 3: Exosomal and cellular protein contents differ in MM- versus normal BM-MSCs.**

| rank | protein                                                                                                         | Sample 1                                        |                                                 | Sample 2                                        |                                                 | Sample 3                                        |                                                 | Sample 4                                        |                                                 | Sample 5                                        |                                                 |
|------|-----------------------------------------------------------------------------------------------------------------|-------------------------------------------------|-------------------------------------------------|-------------------------------------------------|-------------------------------------------------|-------------------------------------------------|-------------------------------------------------|-------------------------------------------------|-------------------------------------------------|-------------------------------------------------|-------------------------------------------------|
|      |                                                                                                                 | Exosomal<br>Log fold<br>change<br>to the base 2 | Cellular<br>Log fold<br>change<br>to the base 2 | Exosomal<br>Log fold<br>change<br>to the base 2 | Cellular<br>Log fold<br>change<br>to the base 2 | Exosomal<br>Log fold<br>change<br>to the base 2 | Cellular<br>Log fold<br>change<br>to the base 2 | Exosomal<br>Log fold<br>change<br>to the base 2 | Cellular<br>Log fold<br>change<br>to the base 2 | Exosomal<br>Log fold<br>change<br>to the base 2 | Cellular<br>Log fold<br>change<br>to the base 2 |
| 1    | fibronectin 1                                                                                                   | 0.35900                                         | 0.19095                                         | 1.67000                                         | 0.31039                                         | -0.49061                                        | 0.16656                                         | 1.66655                                         | 0.01467                                         | -0.00586                                        | 0.20874                                         |
| 2    | junction plakoglobin                                                                                            | 0.37100                                         | 0.05285                                         | 0.65400                                         | 0.00674                                         | 0.41327                                         | -0.04109                                        | 0.62266                                         | -0.06520                                        | 0.41400                                         | 0.00266                                         |
| 3    | chemokine (C-C motif) ligand 2                                                                                  | 0.18900                                         | -0.18363                                        | 0.38500                                         | -0.03877                                        | 0.11571                                         | 0.00376                                         | 0.48476                                         | -0.01549                                        | 0.33900                                         | -0.07906                                        |
| 4    | mitogen-activated protein kinase kinase 5                                                                       | 0.32600                                         | -0.36435                                        | 0.18400                                         | -0.10136                                        | -0.04597                                        | -0.23869                                        | 0.72870                                         | 0.01075                                         | -0.07780                                        | -0.09635                                        |
| 5    | excision repair cross-complementing rodent repair deficiency, complementation group 2 (xeroderma pigmentosum D) | -0.01460                                        | 0.07869                                         | 0.23800                                         | 0.10599                                         | 0.20842                                         | 0.03245                                         | 0.22952                                         | -0.09015                                        | 0.40300                                         | 0.06317                                         |
| 6    | ubiquitin-conjugating enzyme E2E 1 (UBC4/5 homolog, yeast)                                                      | -0.14600                                        | 0.28015                                         | 0.34000                                         | 0.16874                                         | 0.43746                                         | 0.33339                                         | -0.37367                                        | 0.00906                                         | 0.77100                                         | 0.24043                                         |
| 7    | DEAH (Asp-Glu-Ala-His) box polypeptide 38                                                                       | 0.32700                                         | -0.01864                                        | 0.34400                                         | -0.01971                                        | -0.10656                                        | -0.02587                                        | 0.53711                                         | 0.11110                                         | -0.08390                                        | 0.04931                                         |
| 8    | interleukin 13                                                                                                  | -0.09330                                        | 0.40058                                         | 0.32600                                         | 0.29170                                         | 0.28658                                         | 0.35945                                         | -0.04807                                        | 0.14258                                         | 0.43800                                         | -0.32796                                        |
| 9    | cell division cycle 27                                                                                          | 1.50000                                         | -0.16578                                        | -0.00866                                        | -0.07838                                        | -0.33731                                        | -0.28118                                        | 0.47853                                         | 0.03660                                         | -0.72700                                        | -0.27299                                        |
| 10   | RAP1, GTPase activating protein 1                                                                               | -0.17500                                        | 0.48373                                         | -0.00597                                        | 0.28833                                         | 0.26670                                         | 0.36675                                         | 0.18692                                         | -0.15595                                        | 0.55700                                         | -0.10976                                        |
| 11   | non-POU domain containing, octamer-binding                                                                      | 0.17500                                         | -0.33491                                        | 0.28600                                         | -0.20068                                        | -0.22820                                        | -0.17389                                        | 0.43278                                         | 0.10144                                         | 0.15000                                         | -0.19677                                        |
| 12   | interleukin 6 (interferon, beta 2)                                                                              | 0.04080                                         | 0.10712                                         | 0.48400                                         | 0.12234                                         | 0.02692                                         | 0.04404                                         | 0.21594                                         | -0.14923                                        | -0.01370                                        | -0.05026                                        |
| 13   | ribosomal protein S6 kinase, 90kDa, polypeptide 1                                                               | 0.22800                                         | -0.02389                                        | -0.05290                                        | 0.00517                                         | 0.16665                                         | 0.00072                                         | 0.12922                                         | -0.03355                                        | 0.28200                                         | -0.03488                                        |
| 14   | protein kinase C, beta 1                                                                                        | 0.08790                                         | -0.17616                                        | 0.00227                                         | -0.13408                                        | -0.25671                                        | -0.28716                                        | 0.04671                                         | -0.12332                                        | 0.86700                                         | -0.22220                                        |
| 15   | B-cell linker                                                                                                   | 0.23400                                         | 0.10525                                         | 0.24100                                         | 0.13942                                         | 0.06295                                         | 0.02853                                         | 0.14351                                         | 0.00070                                         | 0.01230                                         | 0.07743                                         |

|      |                                                                                                                                                                | Sample 1                         |                                  | Sample 2                         |                                  | Sample 3                         |                                  | Sample 4                         |                                  | Sample 5                         |                                  |
|------|----------------------------------------------------------------------------------------------------------------------------------------------------------------|----------------------------------|----------------------------------|----------------------------------|----------------------------------|----------------------------------|----------------------------------|----------------------------------|----------------------------------|----------------------------------|----------------------------------|
| rank | protein                                                                                                                                                        | Exosomal                         | Cellular                         |
|      |                                                                                                                                                                | Log fold change<br>to the base 2 |
| 16   | early endosome antigen 1, 162kD                                                                                                                                | 0.19400                          | 0.06774                          | 0.52500                          | 0.07767                          | -0.04353                         | -0.02409                         | 0.04703                          | 0.00993                          | -0.04880                         | 0.06440                          |
| 17   | procollagen-proline, 2-oxoglutarate 4-dioxygenase (proline 4-hydroxylase), beta polypeptide (protein disulfide isomerase; thyroid hormone binding protein p55) | -0.11000                         | 0.01181                          | 0.56700                          | -0.33091                         | 0.27012                          | 0.10610                          | -0.10029                         | 0.12952                          | 0.03160                          | -0.27219                         |
| 18   | nucleoporin 88kDa                                                                                                                                              | 0.25900                          | -0.52738                         | 0.46900                          | -0.52689                         | -0.09707                         | -0.55783                         | 0.24322                          | -0.15896                         | -0.23000                         | -0.54987                         |
| 19   | cholinergic receptor, muscarinic 1                                                                                                                             | 0.24800                          | 0.01519                          | 0.15800                          | 0.12686                          | 0.04865                          | 0.07025                          | 0.07723                          | 0.04479                          | 0.11100                          | 0.06557                          |
| 20   | eukaryotic translation initiation factor 4E                                                                                                                    | 0.18400                          | -0.13851                         | 0.00732                          | -0.17014                         | -0.08794                         | -0.11377                         | 0.15872                          | 0.15698                          | 0.37900                          | -0.21350                         |
| 21   | gelsolin (amyloidosis, Finnish type)                                                                                                                           | 0.03400                          | 0.30081                          | -0.06650                         | 0.14619                          | 0.09676                          | 0.27817                          | 0.38030                          | -0.03358                         | 0.18300                          | 0.30368                          |
| 22   | myogenic factor 3                                                                                                                                              | 0.07130                          | -0.00748                         | 0.15400                          | -0.11656                         | -0.06427                         | -0.14848                         | 0.44634                          | 0.10645                          | -0.00502                         | -0.13470                         |
| 23   | protein kinase, cAMP-dependent, catalytic, alpha                                                                                                               | -0.04200                         | 0.07892                          | 0.05950                          | 0.12320                          | 0.23405                          | 0.01507                          | 0.29854                          | -0.00443                         | 0.01990                          | -0.01382                         |
| 24   | sortilin-related receptor, L(DLR class) A repeats-containing                                                                                                   | 0.11400                          | 0.01576                          | 0.23900                          | -0.01710                         | -0.02983                         | 0.00340                          | 0.29568                          | -0.08725                         | -0.05790                         | 0.00314                          |
| 25   | antigen identified by monoclonal antibody Ki-67                                                                                                                | 0.00335                          | 0.04259                          | 0.28200                          | -0.14639                         | 0.13490                          | -0.02765                         | -0.10742                         | -0.08144                         | 0.24200                          | -0.08533                         |
| 26   | centrosomal protein 2                                                                                                                                          | 0.12200                          | 0.20136                          | 0.31500                          | 0.14751                          | -0.06823                         | 0.19549                          | 0.24541                          | 0.07447                          | -0.06500                         | 0.15117                          |
| 27   | stromal interaction molecule 1                                                                                                                                 | 0.14100                          | 0.12586                          | 0.11800                          | 0.11497                          | 0.09790                          | 0.10009                          | 0.13760                          | -0.09610                         | 0.05220                          | 0.19124                          |
| 28   | small inducible cytokine subfamily E, member 1 (endothelial monocyte-activating)                                                                               | 0.04350                          | 0.41541                          | 0.30200                          | 0.21664                          | -0.02831                         | 0.23685                          | 0.11422                          | 0.06990                          | 0.11500                          | 0.23252                          |
| 29   | tumor necrosis factor (TNF superfamily, member 2)                                                                                                              | 0.14000                          | -0.08282                         | 0.18200                          | -0.44349                         | 0.10621                          | -0.02474                         | 0.10761                          | 0.13307                          | -0.00345                         | -0.16364                         |
| 30   | farnesyl-diphosphate farnesyltransferase 1                                                                                                                     | 0.25200                          | -0.28653                         | 0.43000                          | -0.15096                         | -0.03307                         | -0.14350                         | -0.12425                         | 0.15492                          | -0.01030                         | -0.35149                         |
| 31   | RAB5A, member RAS oncogene family                                                                                                                              | 0.11800                          | 0.10700                          | 0.13700                          | -0.08175                         | 0.11983                          | -0.09179                         | 0.05372                          | -0.13730                         | 0.08390                          | -0.01670                         |

|      |                                         | Sample 1      |               | Sample 2      |               | Sample 3      |               | Sample 4      |               | Sample 5      |               |
|------|-----------------------------------------|---------------|---------------|---------------|---------------|---------------|---------------|---------------|---------------|---------------|---------------|
| rank | protein                                 | Exosomal      | Cellular      |
|      |                                         | Log fold      |
|      |                                         | change        |
|      |                                         | to the base 2 |
| 32   | O-6-methylguanine-DNA methyltransferase | 0.14100       | 0.00363       | 0.15600       | 0.03789       | -0.05489      | -0.04092      | 0.22509       | 0.05180       | 0.04000       | -0.00279      |
